# Supplementary material for: High-density EEG signature of NREM sleep parasomnia episodes
Source: Research Square preprint supplement (doi:10.21203/rs.3.rs-7419588/v1), 2025-09-10
Supplement: Supplementary file 1 [file 3d95bb4748215e2076449430.pdf]

# High-density EEG signature of NREM sleep parasomnia episodes

A. Valomon<sup>1\*\*</sup> – I. De Cuntis<sup>1\*\*</sup>, K. Nakamura<sup>1</sup>, B. A. Riedner<sup>1,2</sup>, S. Jones<sup>1,2</sup>, M. Bazalakova<sup>1,2,3</sup>, D. T. Plante<sup>1,2</sup>, G. Tononi<sup>1</sup> and M. Boly<sup>\*1,3</sup>

<sup>1</sup>Psychiatry - Wisconsin Institute for Sleep and Consciousness, University of Wisconsin-Madison, Madison, WI, 53719, USA

<sup>2</sup>School of Medicine and Public Health, University of Wisconsin-Madison, Madison, WI, USA

<sup>3</sup>Neurology, University of Wisconsin-Madison, Madison, WI, USA

\*Corresponding author: [boly@neurology.wisc.edu](mailto:boly@neurology.wisc.edu)

\*\* the authors contributed equally to this work.

## Supplementary Material

### Suppl. Fig S1 Subdivision of parasomnia subjects based on their behaviors

A gradient on some sleep variables tended to occur between the different sub-groups: current DoA subjects (13), past DoA subjects (6), sleepwalkers only (3), and controls (12). Tests were performed between NREM parasomnia group (n=22) and controls (n=12) only: \* indicate significant differences. Details of the questionnaires codes are reported in Table 1.

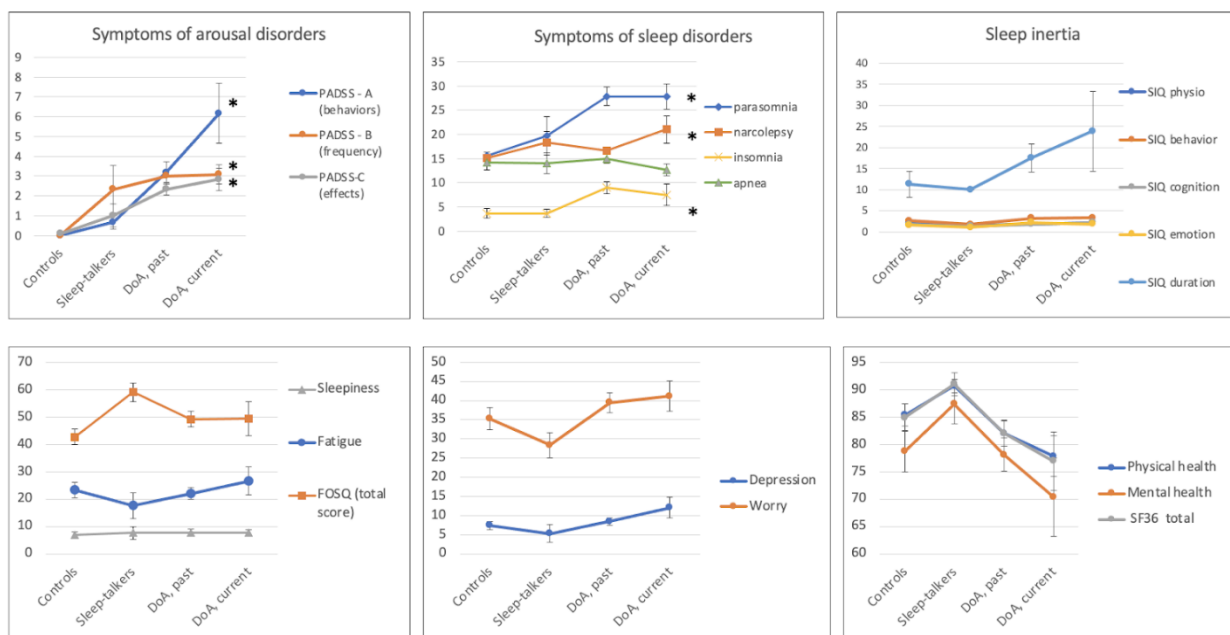

**Suppl. Table S1 Parasomnia episodes with paired sleep**

Matching of parasomnia episodes with awakenings from sleep from the same subject, as much as possible from the same night origin, sleep stage and subsequent consciousness report. (CE for consciousness, N for No consciousness, CNR for Consciousness with no report, . for missing report). Awakenings were as close in time as possible to the PE. Strikethrough unique PE identifiers indicate unusable parasomnia.

| Patient     | Night | Sleep stage | Unique Parasomnia Identifier | Consciousness Report | Unique Awakening Identifier | Night | Sleep Stage | Consciousness Report |
|-------------|-------|-------------|------------------------------|----------------------|-----------------------------|-------|-------------|----------------------|
| <b>P00A</b> | RS    | N2          | <del>66</del>                | N                    | 59                          | RS    | N2          | N                    |
| <b>P00B</b> | RS    | N3          | 86                           | .                    | 84                          | RS    | N3          | N                    |
|             | RS    | N3          | 88                           | N                    | 85                          | RS    | N3          | N                    |
|             | RS    | N3          | 90                           | N                    | 87                          | RS    | N3          | N                    |
| <b>P00C</b> | BS    | N3          | 128                          | .                    | 129                         | BS    | N2          | N                    |
|             | RS    | N3          | 135                          | N                    | 136                         | RS    | N3          | N                    |
| <b>P00D</b> | RS    | N3          | 34                           | N                    | 27                          | RS    | N3          | N                    |
|             | RS    | N2          | 32                           | .                    | 29                          | RS    | N2          | N                    |
|             | RS    | N3          | 33                           | N                    | 30                          | RS    | N2          | CE                   |
|             | RS    | N2          | <del>28</del>                | CE                   | 35                          | RS    | N2          | CE                   |
| <b>P00E</b> | RS    | N3          | 46                           | N                    | 48                          | RS    | N3          | N                    |
|             | RS    | N2          | 51                           | CE                   | 53                          | RS    | N2          | N                    |
|             | RS    | N3          | 43                           | CNR                  | 48                          | RS    | N3          | N                    |
|             | RS    | N2          | 52                           | CE                   | 53                          | RS    | N2          | N                    |
|             | RS    | N3          | 41                           | CE                   | 48                          | RS    | N3          | N                    |
|             | RS    | N2          | 45                           | CE                   | 53                          | RS    | N2          | N                    |
|             | RS    | N3          | <del>49</del>                | CE                   | 48                          | RS    | N3          | N                    |
| <b>P00F</b> | RS    | N3          | 77                           | CE                   | 73                          | RS    | N3          | CE                   |
|             | BS    | N3          | 68                           | .                    | 70                          | BS    | N3          | CE                   |
|             | RS    | N3          | 74                           | CNR                  | 73                          | RS    | N3          | CE                   |
|             | BS    | N3          | 69                           | .                    | 70                          | BS    | N3          | CE                   |
|             | RS    | N3          | 75                           | CE                   | 76                          | RS    | N2          | CE                   |
|             | RS    | N3          | 78                           | CE                   | 79                          | RS    | N2          | CE                   |
| <b>P00G</b> | RS    | N2          | 114                          | CE                   | 112                         | RS    | N2          | CE                   |
|             | RS    | N2          | 111                          | .                    | 112                         | RS    | N2          | CE                   |
|             | RS    | N3          | 113                          | CE                   | 116                         | RS    | N2          | CE                   |
| <b>P00H</b> | RS    | N2          | 160                          | CE                   | 157                         | RS    | N3          | CE                   |
|             | RS    | N3          | 156                          | N                    | 168                         | RS    | N3          | N                    |
|             | RS    | N2          | <del>159</del>               | N                    | 173                         | RS    | N2          | N                    |
| <b>P00I</b> | RS    | N3          | 10                           | CE                   | 9                           | RS    | N2          | CE                   |
|             | RS    | N2          | 5                            | N                    | 9                           | RS    | N2          | CE                   |
|             | RS    | N3          | 4                            | CNR                  | 6                           | RS    | N3          | CNR                  |
|             | RS    | N3          | 8                            | CNR                  | 7                           | RS    | N3          | CNR                  |
| <b>P00L</b> | RS    | N3          | 124                          | N                    | 123                         | RS    | N3          | N                    |
|             | RS    | N3          | 126                          | N                    | 125                         | RS    | N3          | N                    |
| <b>P00M</b> | BS    | N3          | 11                           | .                    | 13                          | BS    | N2          | N                    |
|             | BS    | N3          | 12                           | .                    | 13                          | BS    | N2          | N                    |
|             | RS    | N3          | 17                           | N                    | 16                          | RS    | N2          | N                    |
|             | RS    | N3          | 19                           | N                    | 20                          | RS    | N3          | N                    |
|             | RS    | N3          | <del>15</del>                | N                    | 20                          | RS    | N3          | N                    |
|             | RS    | N3          | <del>18</del>                | N                    | 24                          | RS    | N3          | N                    |
| <b>P00N</b> | RS    | N3          | 143                          | N                    | 144                         | RS    | N3          | N                    |
|             | RS    | N3          | 140                          | N                    | 144                         | RS    | N3          | N                    |
|             | RS    | N3          | 148                          | N                    | 149                         | RS    | N3          | N                    |
|             | RS    | N2          | 147                          | N                    | 151                         | RS    | N2          | N                    |
| <b>P00P</b> | RS    | N3          | 182                          | CE                   | 179                         | RS    | N3          | N                    |
|             | RS    | N2          | 184                          | CE                   | 181                         | RS    | N3          | N                    |
|             | RS    | N3          | 178                          | N                    | 179                         | RS    | N3          | N                    |
|             | RS    | N3          | 180                          | N                    | 181                         | RS    | N3          | N                    |
|             | BS    | N3          | 176                          | .                    |                             |       |             |                      |
|             | BS    | N2          | 177                          | CE                   |                             |       |             |                      |

|             |    |    |     |    |     |    |    |     |
|-------------|----|----|-----|----|-----|----|----|-----|
| <b>P00Q</b> | BS | N3 | 186 | CE | 187 | BS | N2 | CNR |
|             | RS | N2 | 190 | CE | 193 | RS | N2 | CE  |
|             | RS | N3 | 189 | CE | 197 | RS | N3 | CE  |
| <b>P00R</b> | BS | N3 | 252 | CE | 251 | BS | N3 | CE  |
|             | BS | N2 | 254 | N  | 263 | BS | N3 | N   |
|             | BS | N3 | 255 | CE | 251 | BS | N3 | CE  |
|             | BS | N2 | 257 | N  | 263 | BS | N3 | N   |
|             | BS | N2 | 256 | CE | 251 | BS | N3 | CE  |
|             | RS | N3 | 271 | N  | 268 | RS | N3 | N   |
|             | RS | N3 | 274 | N  | 272 | RS | N3 | N   |
|             |    |    |     |    |     |    |    |     |
| <b>P00S</b> | BS | N2 | 291 | N  |     |    |    |     |
|             | BS | N3 | 292 | N  |     |    |    |     |
| <b>P00T</b> | BS | N3 | 338 | N  | 339 | BS | N2 | N   |
|             |    |    |     |    |     |    |    |     |
| <b>P00U</b> | BS | N2 | 348 | N  | 349 | BS | N3 | N   |
|             | BS | N2 | 351 | CE | 349 | BS | N3 | N   |
|             | RS | N3 | 354 | N  | 357 | RS | N2 | N   |
|             | RS | N3 | 356 | N  | 361 | RS | N3 | N   |
|             | RS | N3 | 359 | CE | 363 | RS | N3 | CE  |
|             | RS | N3 | 360 | N  | 364 | RS | N3 | N   |
|             | BS | N2 | 352 | N  | 349 | BS | N3 | N   |
|             |    |    |     |    |     |    |    |     |
| <b>P00V</b> | RS | N3 | 374 | CE | 372 | RS | N3 | CE  |
|             | RS | N2 | 375 | CE | 376 | RS | N3 | CE  |
|             | RS | N2 | 378 | CE | 376 | RS | N3 | CE  |
|             | BS | N2 | 366 | CE |     |    |    |     |
|             | BS | N2 | 367 | CE |     |    |    |     |
|             | BS | N2 | 368 | CE |     |    |    |     |
|             |    |    |     |    |     |    |    |     |
| <b>P00Z</b> | RS | N2 | 385 | CE | 387 | RS | N2 | CE  |
|             | BS | N3 | 379 | CE |     |    |    |     |

**Supp. Table S2**

**Details on parasomnia episodes with conscious experience**

36 PE presented with consciousness upon awakening (divided into CE and CNR). The table presents each parasomnia (subject, origin (baseline or recovery sleep), type of parasomnia (ST, CA), a rating on the amount of sounds (ST) and movement (MVT) (see legend to table 3). Sleepiness upon awakening was obtained from the KSS scale. Details on the parasomnia obtained via the PCQ are indicated (*reminiscence*: did the episode remind the participant of anything already experienced?, *awareness*: were they aware they just had an episode?, *emotions*: were they having negative (-2) or positive emotions (+2),, other scales from 0 to 4 (strongest): *dreamlike experience*: were they aware they were dreaming, *control*: were they in control of what they were doing, *perception*: how much were they perceiving things (seeing/hearing), *thinking*: how much were they thinking during their experience, *faces*: did their experience involve faces, *speech*: did their experience involve speech, *yourself*: how much was their experience centered on themselves, *environment*: how much was it centered on their environment, *space*: were they moving through spaces, *moving*: how much were they or other people moving during their experience, *where*: where did your experience take place). Details of the words pronounced in the report and experience complexity are reported in the main Materials and Methods section.

| Unique PE ID-A1A-C35 | Participant | Night | Parasomnia Type | ST | MVT | Sleep stage | KSS | Consciousness | Reminiscence | Awareness of episode | 12. emotions | 13. dreamlike | 14. control | 15. perceptual | 16. thinking | 17. faces | 18. speech | 19. yourself | 20. environment | 21. space | 22. moving | 23. where | Number of words | Complexity score | Environment related |
|----------------------|-------------|-------|-----------------|----|-----|-------------|-----|---------------|--------------|----------------------|--------------|---------------|-------------|----------------|--------------|-----------|------------|--------------|-----------------|-----------|------------|-----------|-----------------|------------------|---------------------|
| 4                    | P00I        | RS    | CA (simple)     | 1  | 1   | N3          | 6   | CNR           | na           | .                    | na           | na            | na          | na             | na           | na        | na         | na           | na              | na        | na         | na        | 0               | 1                |                     |
| 8                    | P00I        | RS    | Sleep-talk      | 2  | 0   | N3          | 5   | CNR           | na           | yes                  | na           | na            | na          | na             | na           | na        | na         | na           | na              | na        | na         | na        | 0               | 1                |                     |
| 10                   | P00I        | RS    | CA (simple)     | 1  | 1   | N3          | .   | CE            | yes          | .                    | 1            | 3             | 3           | 1              | 2            | 3         | 3          | 3            | 1               | 0         | 1          | outdoors  | 10              | 2                |                     |
| 28                   | P00D        | RS    | CA (simple)     | 1  | 2   | N2          | 9   | CE            | no           | .                    | 0            | 1             | 0           | 2              | 0            | 0         | 0          | 1            | 2               | 0         | 0          | outdoors  | 1               | 2                |                     |
| 41                   | P00E        | RS    | CA (complex)    | 2  | 3   | N3          | 9   | CE            | yes          | yes                  | -2           | 1             | 0           | 3              | 1            | 0         | 0          | .            | .               | .         | .          | .         | 28              | 3                |                     |
| 43                   | P00E        | RS    | CA (complex)    | 2  | 3   | N3          | .   | CNR           | na           | yes                  | na           | na            | na          | na             | na           | na        | na         | na           | na              | na        | na         | na        | 0               | 1                |                     |
| 45                   | P00E        | RS    | Sleep-talk      | 2  | 0   | N2          | .   | CE            | .            | no                   | .            | .             | .           | .              | .            | .         | .          | .            | .               | .         | .          | .         | 10              | 2                |                     |
| 49                   | P00E        | RS    | CA (complex)    | 1  | 3   | N3          | 4   | CE            | yes          | no                   | 1            | .             | .           | .              | .            | 0         | 2          | .            | .               | .         | 1          | indoors   | 10              | 2                |                     |
| 51                   | P00E        | RS    | CA (complex)    | 1  | 3   | N2          | 6   | CE            | no           | yes                  | 0            | 1             | 2           | 1              | 1            | 0         | 3          | 3            | 2               | 1         | 1          | indoors   | 24              | 3                |                     |
| 52                   | P00E        | RS    | CA (complex)    | 0  | 3   | N3          | 6   | CE            | yes          | yes                  | 0            | 2             | 1           | 3              | 1            | 0         | 1          | 3            | 2               | 0         | 2          | indoors   | 40              | 3                |                     |
| 74                   | P00F        | RS    | CA (simple)     | 0  | 2   | N3          | 6   | CNR           | na           | .                    | na           | na            | na          | na             | na           | na        | na         | na           | na              | na        | na         | na        | 0               | 1                |                     |
| 75                   | P00F        | RS    | CA (complex)    | 2  | 3   | N3          | 8   | CE            | .            | yes                  | .            | .             | .           | .              | .            | .         | .          | .            | .               | .         | .          | .         | 52              | 3                |                     |
| 77                   | P00F        | RS    | CA (complex)    | 0  | 3   | N3          | .   | CE            | yes          | no                   | 1            | 4             | 3           | 2              | 2            | 4         | 2          | 1            | 1               | 3         | 4          | both      | 74              | 3                |                     |
| 78                   | P00F        | RS    | CA (complex)    | 2  | 3   | N3          | 6   | CE            | yes          | no                   | 1            | 2             | 3           | 2              | 1            | 4         | 2          | 3            | 0               | 3         | 4          | outdoors  | 58              | 3                |                     |
| 113                  | P00G        | RS    | Sleep-talk      | 2  | 0   | N3          | 7   | CE            | yes          | no                   | 0            | 3             | 2           | 4              | 3            | 0         | 4          | 4            | 0               | 0         | 0          | neither   | 18              | 2                | yes                 |
| 114                  | P00G        | RS    | Sleep-talk      | 1  | 0   | N2          | 7   | CE            | yes          | no                   | 0            | 3             | 3           | 4              | 3            | 0         | 4          | 4            | 0               | 0         | 0          | indoors   | 12              | 2                | yes                 |
| 160                  | P00H        | RS    | Sleep-talk      | 2  | 0   | N2          | 9   | CE            | .            | .                    | .            | .             | .           | .              | .            | .         | .          | .            | .               | .         | .          | .         | 18              | 2                | yes                 |
| 177                  | P00P        | BS    | CA (complex)    | 2  | 3   | N2          | 7   | CE            | no           | yes                  | -1           | 3             | 0           | 3              | 4            | 1         | 4          | 1            | 4               | 1         | 3          | neither   | 29              | 3                |                     |
| 182                  | P00P        | RS    | CA (complex)    | 2  | 3   | N3          | 6   | CE            | yes          | .                    | 0            | .             | .           | .              | .            | .         | .          | .            | .               | .         | .          | .         | 23              | 3                |                     |
| 184                  | P00P        | RS    | Sleep-talk      | 2  | 0   | N2          | 5   | CE            | yes          | yes                  | .            | .             | .           | .              | .            | .         | .          | .            | .               | .         | .          | .         | 12              | 2                |                     |
| 186                  | P00Q        | BS    | Sleep-talk      | 1  | 0   | N3          | 8   | CE            | no           | no                   | 0            | 0             | 1           | 4              | 2            | 2         | 2          | 3            | 1               | 1         | 1          | outdoors  | 27              | 3                |                     |
| 189                  | P00Q        | RS    | CA (complex)    | 2  | 3   | N3          | 8   | CE            | .            | yes                  | .            | .             | .           | .              | .            | .         | .          | .            | .               | .         | .          | .         | 5               | 2                |                     |
| 190                  | P00Q        | RS    | Sleep-talk      | 1  | 0   | N2          | 8   | CE            | yes          | .                    | 1            | 0             | 3           | 2              | 0            | 0         | 3          | 4            | 0               | 0         | 0          | indoors   | 21              | 2                | yes                 |
| 252                  | P00R        | BS    | CA (simple)     | 0  | 1   | N3          | 6   | CE            | no           | .                    | 1            | 0             | 0           | 2              | 0            | 1         | 0          | 0            | 0               | 0         | 2          | neither   | 4               | 2                |                     |
| 255                  | P00R        | BS    | Sleep-talk      | 2  | 0   | N3          | 4   | CE            | no           | no                   | 0            | 0             | 0           | 0              | 0            | 0         | 1          | 0            | 0               | 0         | 0          | neither   | 6               | 2                |                     |
| 256                  | P00R        | BS    | Sleep-talk      | 2  | 0   | N2          | 4   | CE            | yes          | yes                  | 0            | 0             | 1           | 1              | 2            | 0         | 4          | 4            | 4               | 0         | 0          | indoors   | 10              | 2                | yes                 |
| 351                  | P00U        | BS    | CA (complex)    | 2  | 3   | N2          | 7   | CE            | yes          | yes                  | -2           | 0             | 3           | 4              | 3            | 0         | 0          | 2            | 4               | 0         | 2          | indoors   | 9               | 2                |                     |
| 359                  | P00U        | RS    | CA (complex)    | 2  | 3   | N3          | 5   | CE            | yes          | no                   | 2            | 0             | 2           | .              | 3            | 3         | 3          | 3            | 1               | 1         | 0          | indoors   | 8               | 2                |                     |
| 366                  | P00V        | BS    | Sleep-talk      | 1  | 0   | N2          | 3   | CE            | no           | no                   | 1            | 0             | 4           | 4              | 3            | 0         | 3          | 3            | 3               | 0         | 3          | indoors   | 10              | 2                |                     |
| 367                  | P00V        | BS    | CA (simple)     | 1  | 1   | N2          | 6   | CE            | yes          | yes                  | 0            | 2             | 3           | 3              | 4            | 3         | 4          | 3            | 2               | 0         | 1          | both      | 26              | 3                |                     |
| 368                  | P00V        | BS    | Sleep-talk      | 1  | 0   | N2          | 7   | CE            | yes          | .                    | 0            | 2             | 2           | 4              | 4            | 0         | 4          | 4            | 3               | 0         | 0          | indoors   | 3               | 2                | yes                 |
| 374                  | P00V        | RS    | CA (complex)    | 1  | 3   | N3          | 6   | CE            | yes          | yes                  | 0            | 0             | 4           | 4              | 4            | 3         | 4          | 4            | 0               | 1         | 3          | both      | 13              | 2                | yes                 |
| 375                  | P00V        | RS    | Sleep-talk      | 1  | 0   | N2          | 5   | CE            | yes          | yes                  | 0            | 0             | 2           | 4              | 4            | 0         | 4          | 4            | 2               | 0         | 3          | indoors   | 11              | 2                | yes                 |
| 378                  | P00V        | RS    | Sleep-talk      | 1  | 0   | N2          | 8   | CE            | yes          | .                    | 0            | 0             | 0           | 3              | 3            | 0         | 4          | 3            | 0               | 0         | 0          | .         | 11              | 2                | yes                 |
| 379                  | P00Z        | BS    | CA (simple)     | 1  | 2   | N3          | 8   | CE            | no           | .                    | 0            | 1             | 1           | .              | 3            | 4         | 3          | 3            | 4               | 1         | 1          | indoors   | 6               | 2                | yes                 |
| 385                  | P00Z        | RS    | Sleep-talk      | 1  | 0   | N2          | 9   | CE            | yes          | yes                  | 0            | 1             | 3           | 3              | 4            | 3         | 4          | 4            | 4               | 0         | 0          | indoors   | 14              | 2                | yes                 |
